# Supplementary material
Source: publisher figshare collection journal article supplement (https://rs.figshare.com/ndownloader/files/14401271)
Supplement: Supplementary file 1 [file 14401271]

Depth,Age,Oxygen Isotope Samples,Corr. d18O,,dT_from_midYD,dT2_from_midYD,T estimated based on 0.55 deg per mil
9.5,73.68686869,VT12-TP12-48A-1B-35-36,-11.49956845,,0.007190576,0.002055016,T2 estimated based on 0.21 permil per degree
14.5,145.1010101,VT12-TP12-48A-1B-40-41,-11.44207364,,0.111726595,0.275839829,
19.5,216.5151515,VT12-TP12-48A-1B-45-46,-11.47839231,,0.045692648,0.102893776,
22.5,259.3636364,VT12-TP12-48A-1B-48-49,-11.4671794,,0.06607975,0.156288569,
24.5,287.9292929,VT12-TP12-48A-1B-50-51,-11.16039899,,0.623862323,1.617147686,
29.5,359.3434343,VT12-TP12-48A-1B-55-56,-10.89964092,,1.097967893,2.858852751,
38.5,487.8888889,VT12-TP12-48A-1B-64-65,-11.0789929,,0.771873383,2.004795701,
44.5,573.5858586,VT12-TP12-48A-1B-70-71,-11.03354804,,0.854500413,2.221199828,
49.5,645,VT12-TP12-48A-1B-75-76,-10.577972,,1.682820479,4.390609524,
54.5,840.7142857,VT12-TP12-48A-1B-80-81,-10.45585741,,1.904847003,4.972107564,
59.5,1036.428571,VT12-TP12-48A-1B-85-86,-10.24111056,,2.295295829,5.99471163,
64.5,1232.142857,VT12-TP12-48A-1B-90-91,-10.24253807,,2.292700356,5.987913963,
69.5,1427.857143,VT12-TP12-48A-1B-95-96,-10.1284016,,2.5002212,6.531420938,
71.5,2056.5,VT12-TP12-48A-1B-97-98,-10.21514375,,2.342508206,6.118363095,
72.5,2646,VT12-TP12-48A-2B-2-3,-10.59199788,,1.657318883,4.32381963,
74.5,3825,VT12-TP12-48A-2B-4-5,-10.25606751,,2.268101364,5.923488032,
75.5,4414.5,VT12-TP12-48A-2B-5-6,-10.07503875,,2.597244577,6.78552978,
76.5,5004,VT12-TP12-48A-2B-6-7,-10.16443377,,2.434708174,6.359839202,
78.5,6183,VT12-TP12-48A-2B-8-9,-10.45812159,,1.900730313,4.961325756,
80.5,7362,VT12-TP12-48A-2B-10-11,-10.51756349,,1.792654141,4.678269114,
82.5,7533.333333,VT12-TP12-48A-2B-12-13,-10.16270169,,2.437857398,6.36808717,
84.5,7704.666667,VT12-TP12-48A-2B-14-15,-10.00117682,,2.731538992,7.137253249,
85.5,7790.333333,VT12-TP12-48A-2B-15-16,-10.19944487,,2.371051622,6.19311966,
86.5,7876,VT12-TP12-48A-2B-16-17,-10.55757202,,1.719911358,4.487752303,
88.5,8047.333333,VT12-TP12-48A-2B-18-19,-10.5966094,,1.648934298,4.301860002,
90.5,8218.666667,VT12-TP12-48A-2B-20-21,-11.22203257,,0.511801253,1.32365441,
91.5,8304.333333,VT12-TP12-48A-2B-21-22,-10.77227975,,1.329533661,3.465334524,
92.5,8390,VT12-TP12-48A-2B-22-23,-11.09245302,,0.747400436,1.940699887,
94.5,8561.333333,VT12-TP12-48A-2B-24-25,-10.64769028,,1.55605997,4.058617714,
95.5,8647,VT12-TP12-48A-2B-25-26,-10.54246194,,1.747384216,4.559705027,
96.5,8680.413793,VT12-TP12-48A-2B-26-27,-10.61515294,,1.615218775,4.213557441,
98.5,8747.241379,VT12-TP12-48A-2B-28-29,-10.69291826,,1.473827271,3.84324636,
100.5,8814.068966,VT12-TP12-48A-2B-30-31,-10.92864575,,1.045231842,2.720734524,
102.5,8880.896552,VT12-TP12-48A-2B-32-33,-10.66904244,,1.517237863,3.956940768,
104.5,8947.724138,VT12-TP12-48A-2B-34-35,-10.43204353,,1.948144961,5.085506978,
105.5,8981.137931,VT12-TP12-48A-2B-35-36,-10.67039073,,1.514786426,3.950520338,
106.5,9014.551724,VT12-TP12-48A-2B-36-37,-10.37352148,,2.054548703,5.364183444,
108.5,9081.37931,VT12-TP12-48A-2B-38-39,-10.31111458,,2.16801579,5.661359149,
110.5,9148.206897,VT12-TP12-48A-2B-40-41,-10.46307032,,1.891732631,4.937760398,
112.5,9215.034483,VT12-TP12-48A-2B-42-43,-10.20848348,,2.354617784,6.150078657,
114.5,9281.862069,VT12-TP12-48A-2B-44-45,-9.626846683,,3.412139236,8.919777698,
115.5,9315.275862,VT12-TP12-48A-2B-45-46,-10.11538086,,2.523895287,6.593424497,
116.5,9348.689655,VT12-TP12-48A-2B-46-47,-9.976063398,,2.777199756,7.256840963,
118.5,9415.517241,VT12-TP12-48A-2B-48-49,-9.934977106,,2.851902104,7.45248997,
120.5,9482.344828,VT12-TP12-48A-2B-50-51,-10.27506787,,2.233555265,5.833010156,
122.5,9549.172414,VT12-TP12-48A-2B-52-53,-10.55267094,,1.728822408,4.511090767,
124.5,9616,VT12-TP12-48A-2B-54-55,-10.66918541,,1.516977918,3.956259959,
125.5,9632.824074,VT12-TP12-48A-2B-55-56,-10.4134544,,1.981943385,5.17402666,
126.5,9649.648148,VT12-TP12-48A-2B-56-57,-10.04225884,,2.656844413,6.941624589,
128.5,9683.296296,VT12-TP12-48A-2B-58-59,-10.32821724,,2.136920039,5.579917897,
130.5,9716.944444,VT12-TP12-48A-2B-60-61,-10.32374133,,2.145058065,5.601231774,
132.5,9750.592593,VT12-TP12-48A-2B-62-63,-10.81381863,,1.254008431,3.267530351,
134.5,9784.240741,VT12-TP12-48A-2B-64-65,-10.46236303,,1.893018598,4.941128406,
135.5,9801.064815,VT12-TP12-48A-2B-65-66,-10.07361315,,2.599836574,6.792318343,
136.5,9817.888889,VT12-TP12-48A-2B-66-67,-10.19402659,,2.38090305,6.218921021,
138.5,9851.537037,VT12-TP12-48A-2B-68-69,-10.55610008,,1.722587601,4.494761511,
140.5,9885.185185,VT12-TP12-48A-2B-70-71,-10.528387,,1.772975031,4.626728588,
142.5,9918.833333,VT12-TP12-48A-2B-72-73,-10.29372493,,2.199633327,5.744166984,
144.5,9952.481481,VT12-TP12-48A-2B-74-75,-10.3626938,,2.074235388,5.41574381,
145.5,9969.305556,VT12-TP12-48A-2B-75-76,-10.60467404,,1.634271317,4.263456958,
146.5,9986.12963,VT12-TP12-48A-2B-76-77,-11.0750997,,0.778951933,2.023334762,
148.5,10019.77778,VT12-TP12-48A-2B-78-79,-10.34831167,,2.100384721,5.484230159,
150.5,10053.42593,VT12-TP12-48A-2B-80-81,-10.1749037,,2.415671929,6.309982368,
152.5,10087.07407,VT12-TP12-48A-2B-82-83,-10.37070203,,2.059674964,5.377609365,
154.5,10120.72222,VT12-TP12-48A-2B-84-85,-10.22132397,,2.331271449,6.088933492,
155.5,10137.5463,VT12-TP12-48A-2B-85-86,-10.35353919,,2.09088013,5.459337181,
156.5,10154.37037,VT12-TP12-48A-2B-86-87,-10.57320875,,1.691480933,4.413291667,
158.5,10188.01852,VT12-TP12-48A-2B-88-89,-10.124408,,2.507482297,6.550438095,
160.5,10221.66667,VT12-TP12-48A-2B-90-91,-10.2622835,,2.25679957,5.893888095,
162.5,10255.31481,VT12-TP12-48A-2B-92-93,-10.3945633,,2.016290842,5.263984286,
164.5,10288.96296,VT12-TP12-48A-2B-94-95,-10.44195897,,1.930116903,5.038290635,
165.5,10305.78704,VT12-TP12-48A-2B-95-96,-10.01577872,,2.704990086,7.067720401,
166.5,10322.61111,VT12-TP12-48A-2B-96-97,-10.88649763,,1.121864782,2.921439841,
168.5,10356.25926,VT12-TP12-48A-2B-98-99,-10.09221163,,2.566021145,6.703754127,
170.5,10389.90741,VT12-TP12-48A-2B-100-101,-9.797318279,,3.102190881,8.108008197,
172.5,10423.55556,VT12-TP12-48A-2B-102-103,-10.52465623,,1.779758236,4.644494127,
177.5,10507.67593,VT12-TP12-48A-3B-4-5,-10.43950747,,1.934574176,5.049964444,
178.5,10524.5,VT12-TP12-48A-3B-5-6,-10.14380662,,2.472212076,6.458063708,
179.5,10541.32407,VT12-TP12-48A-3B-6-7,-10.5244928,,1.780055388,4.645272381,
181.5,10574.97222,VT12-TP12-48A-3B-8-9,-10.7780285,,1.319081388,3.437959524,
183.5,10608.62037,VT12-TP12-48A-3B-10-11,-9.98275529,,2.765032678,7.224974808,
185.5,10642.26852,VT12-TP12-48A-3B-12-13,-9.849186267,,3.007885449,7.861017778,
187.5,10675.91667,VT12-TP12-48A-3B-14-15,-9.962282133,,2.8022566,7.322466032,
188.5,10692.74074,VT12-TP12-48A-3B-15-16,-9.941350674,,2.840313799,7.422139649,
189.5,10709.56481,VT12-TP12-48A-3B-16-17,-10.30549213,,2.178238418,5.688132698,
191.5,10743.21296,VT12-TP12-48A-3B-18-19,-10.3117026,,2.166946661,5.658559048,
193.5,10776.86111,VT12-TP12-48A-3B-20-21,-9.801929849,,3.093806208,8.086048338,
195.5,10810.50926,VT12-TP12-48A-3B-22-23,-9.955581367,,2.814439812,7.354374444,
197.5,10844.15741,VT12-TP12-48A-3B-24-25,-9.9160305,,2.886350479,7.542711905,
198.5,10860.98148,VT12-TP12-48A-3B-25-26,-10.00478129,,2.724985405,7.120089091,
199.5,10877.80556,VT12-TP12-48A-3B-26-27,-9.977318,,2.774918661,7.250866667,
201.5,10911.4537,VT12-TP12-48A-3B-28-29,-10.03346176,,2.672839089,6.983515409,
203.5,10945.10185,VT12-TP12-48A-3B-30-31,-10.08572866,,2.577808377,6.734625446,
205.5,10978.75,VT12-TP12-48A-3B-32-33,-9.955417933,,2.814736964,7.355152698,
207.5,11012.39815,VT12-TP12-48A-3B-34-35,,,,,
208.5,11029.22222,VT12-TP12-48A-3B-35-36,-9.837670014,,3.028824091,7.915857078,
209.5,11046.0463,VT12-TP12-48A-3B-36-37,-10.1626514,,2.437948842,6.368326667,
211.5,11079.69444,VT12-TP12-48A-3B-38-39,-10.29470553,,2.197850418,5.73949746,
213.5,11113.34259,VT12-TP12-48A-3B-40-41,-9.654725689,,3.361450135,8.787020528,
215.5,11146.99074,VT12-TP12-48A-3B-42-43,-10.1008736,,2.550272115,6.662506667,
217.5,11180.63889,VT12-TP12-48A-3B-44-45,-10.12154193,,2.512693327,6.564086031,
218.5,11197.46296,VT12-TP12-48A-3B-45-46,-9.873855117,,2.963032993,7.743547061,
219.5,11214.28704,VT12-TP12-48A-3B-46-47,-10.13993417,,2.479252903,6.476503968,
221.5,11247.93519,VT12-TP12-48A-3B-48-49,-10.036154,,2.667944115,6.970695238,
223.5,11281.58333,VT12-TP12-48A-3B-50-51,-10.22099976,,2.331860915,6.090477334,
225.5,11315.23148,VT12-TP12-48A-3B-52-53,-10.32706533,,2.139014418,5.585403175,
227.5,11348.87963,VT12-TP12-48A-3B-54-55,-10.54112719,,1.749811037,4.566060986,
228.5,11365.7037,VT12-TP12-48A-3B-55-56,-10.14836034,,2.463932586,6.436379328,
229.5,11382.52778,VT12-TP12-48A-3B-56-57,-10.76016367,,1.351562903,3.523030159,
231.5,11416.17593,VT12-TP12-48A-3B-58-59,-10.85724307,,1.175054903,3.060747302,
233.5,11499.78261,VT12-TP12-48A-3B-60-61,-10.45593425,,1.904707297,4.971741667,
235.5,11633.34783,VT12-TP12-48A-3B-62-63,-11.08948183,,0.7528026,1.954848413,
236.5,11700.13043,VT12-TP12-48A-3B-63-64,-11.42106725,,0.149920024,0.375870238,
237.5,11766.91304,VT12-TP12-48A-3B-64-65,-11.6748335,,-0.311473158,-0.832540476,
238.5,11833.69565,VT12-TP12-48A-3B-65-66,-11.39898476,,0.19007001,0.481024963,
239.5,11900.47826,VT12-TP12-48A-3B-66-67,-11.52819882,,-0.044864641,-0.134280075,
241.5,12034.04348,VT12-TP12-48A-3B-68-69,-11.45475533,,0.088668964,0.215450794,
243.5,12167.6087,VT12-TP12-48A-3B-70-71,-11.32186025,,0.330296388,0.848284524,
244.5,12234.3913,VT12-TP12-48A-3B-71-72,-11.60896925,,-0.191719976,-0.51890119,
245.5,12301.17391,VT12-TP12-48A-3B-72-73,-11.46766657,,0.065193994,0.15396873,
247.5,12434.73913,VT12-TP12-48A-3B-74-75,-11.57291763,,-0.126171582,-0.347226825,
248.5,12501.52174,VT12-TP12-48A-3B-75-76,-10.91460769,,1.070755582,2.787582414,
249.5,12568.30435,VT12-TP12-48A-3B-76-77,-11.08212733,,0.766174418,1.989869841,
251.5,12701.86957,VT12-TP12-48A-3B-78-79,-10.34511482,,2.106197172,5.499453244,
253.5,12835.43478,VT12-TP12-48A-3B-80-81,-10.50938215,,1.807529294,4.71722785,
254.5,12902.21739,VT12-TP12-48A-3B-81-82,-10.76636675,,1.34028457,3.493491667,
255.5,12969,VT12-TP12-48A-3B-82-83,-10.61230025,,1.620405479,4.227141667,
,,,,,,,
,,,,,,,
,,,,,,,
,,,,,,,
,,,,,,,
,,,,,,,
,,,,,,,
,,,,,,,
,,,,,,,
,,,,,,,
,,,,,,,
,,,,,,,
,,,,,,,
,,,,,,,
,,,,,,,
,,,,,,,
,,,,,,,
,,,,,,,
,,,,,,,
,,,,,,,
,,,,,,,
,,,,,,,
,,,,,,,
,,,,,,,
,,,,,,,
,,,,,,,
,,,,,,,
,,,,,,,
,,,,,,,
,,,,,,,
,,,,,,,
,,,,,,,
,,,,,,,
,,,,,,,
,,,,,,,
,,,,,,,
,,,,,,,
,,,,,,,
,,,,,,,
,,,,,,,
,,,,,,,
,,,,,,,
,,,,,,,
,,,,,,,
,,,,,,,
,,,,,,,
,,,,,,,
,,,,,,,
,,,,,,,
,,,,,,,
,,,,,,,
,,,,,,,
,,,,,,,
,,,,,,,
,,,,,,,
,,,,,,,
,,,,,,,
,,,,,,,
,,,,,,,
,,,,,,,
,,,,,,,
,,,,,,,
,,,,,,,
,,,,,,,
,,,,,,,
,,,,,,,
,,,,,,,
,,,,,,,
,,,,,,,
,,,,,,,
,,,,,,,
,,,,,,,
,,,,,,,
,,,,,,,
,,,,,,,
,,,,,,,
,,,,,,,
,,,,,,,
,,,,,,,
,,,,,,,
,,,,,,,
,,,,,,,
,,,,,,,
,,,,,,,
,,,,,,,
,,,,,,,
,,,,,,,
,,,,,,,
,,,,,,,
,,,,,,,
,,,,,,,
,,,,,,,
,,,,,,,
,,,,,,,
,,,,,,,
,,,,,,,
,,,,,,,
,,,,,,,
,,,,,,,
,,,,,,,
,,,,,,,
,,,,,,,
,,,,,,,
,,,,,,,
,,,,,,,
,,,,,,,
,,,,,,,
,,,,,,,
,,,,,,,
,,,,,,,
,,,,,,,
,,,,,,,
,,,,,,,
,,,,,,,
,,,,,,,
,,,,,,,
,,,,,,,
,,,,,,,
,,,,,,,
,,,,,,,
,,,,,,,
,,,,,,,
,,,,,,,
,,,,,,,
,,,,,,,
,,,,,,,
,,,,,,,
,,,,,,,
,,,,,,,
,,VT12-TP12-48A-3B-84-85,-10.77540004,,,,
,,VT12-TP12-48A-3B-85-86,-10.91849667,,,,
,,VT12-TP12-48A-3B-86-87,-10.99840398,,,,
,,VT12-TP12-48A-3B-88-89,-10.55087527,,,,
,,VT12-TP12-48A-3B-90-91,-9.87488799,,,,
,,VT12-TP12-48A-3B-92-93,-9.94754755,,,,
,,VT12-TP12-48A-3B-94-95,-9.737069909,,,,
,,VT12-TP12-48A-3B-95-96,-9.779905629,,,,
,,VT12-TP12-48A-3B-96-97,-9.702915083,,,,
,,VT12-TP12-48A-3B-98-99,-9.514363102,,,,
,,VT12-TP12-48A-3B-100-101,-9.384041542,,,,
